# Supplementary material
Source: PubMed Central journal article supplement (PMC4117831)
Supplement: NIHMS560853-supplement-1.pdf [file NIHMS560853-supplement-1.pdf]

## SUPPLEMENTARY FIGURE LEGENDS

**Supplementary Figure S1. Comparable expression of Jak2 WT and Jak2V617F alleles in total BM and purified LSK, MEP and late progenitors of C57BL/6 background heterozygous Jak2V617F mice.**

The relative expression of wild-type Jak2 and mutant Jak2V617F was determined in the total BM as well as in sorted LSK, MEP, granulocyte (Gr-1), erythroid (Ter119), megakaryocyte (CD41), B-lymphoid (B220) and T-lymphoid (Thy-1) cells from heterozygous Jak2V617F mice (in a pure C57BL/6 background) by the T/G ratio (T-peak identifies the mutant, G-peak identifies the wild-type allele) after direct sequencing of the real-time PCR products as described previously.<sup>10</sup> Notably, C57BL/6 heterozygous Jak2V617F mice hematopoietic progenitors express almost equal levels of *Jak2V617F* and *Jak2WT* alleles.

**Supplementary Figure S2. Heterozygous Jak2 deletion significantly alters peripheral blood counts in Jak2V617F knock-in mice but not in wild-type background mice.**

Peripheral blood hematocrit (a), hemoglobin (b), RBC (c), WBC (d), neutrophil (e) and platelet (f) counts were assessed at 12 weeks after pl-pC induction in control ( $Jak2^{+/+}$ ), heterozygous Jak2-deleted ( $Jak2^{+/-}$ ), and heterozygous ( $Jak2^{VF/+}$ ), hemizygous ( $Jak2^{VF/-}$ ) or homozygous ( $Jak2^{VF/VF}$ ) Jak2V617F-expressing mice (n=7 for  $Jak2^{+/-}$ , n=10 for all other genotypes). NS indicates not significant compared with controls; asterisks indicate significant differences (p<0.05) (\* indicates significance when compared with controls; \*\* indicates significance when compared with controls and  $Jak2^{VF/+}$ ; \*\*\* indicates significance when compared with controls,  $Jak2^{VF/+}$  and  $Jak2^{VF/-}$ ). Whereas deletion of Jak2 WT allele significantly increases WBC, neutrophil and platelet counts in Jak2V617F knock-in mice, deletion of heterozygous Jak2 in

wild-type background mice ( $Jak2^{+/-}$ ) does not significantly alter peripheral blood counts compared with control animals.

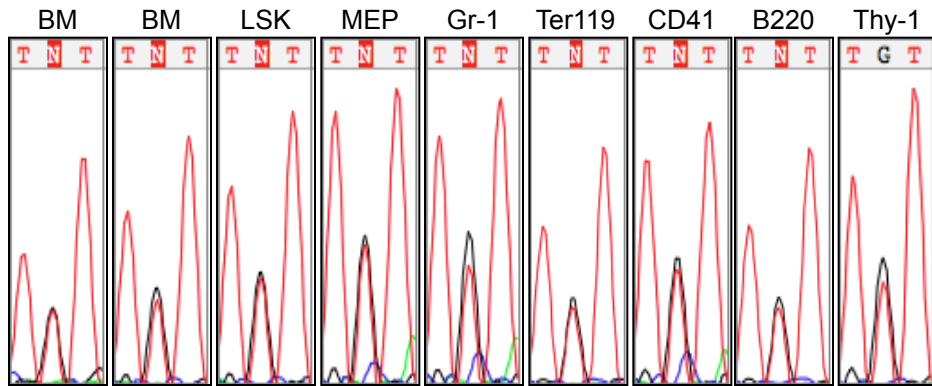

**Supplementary Figure S1**

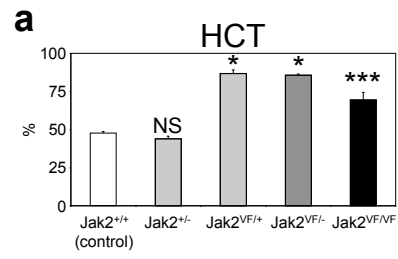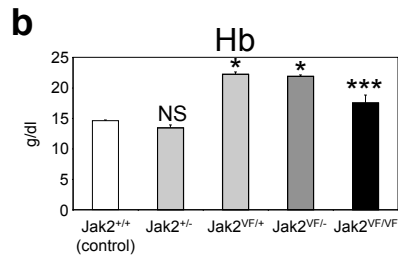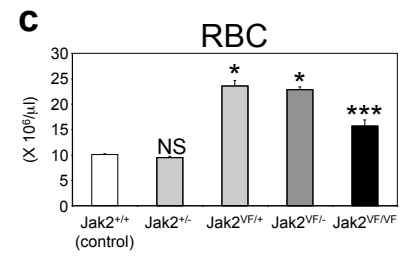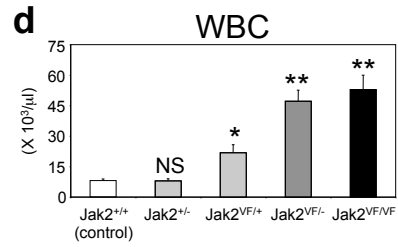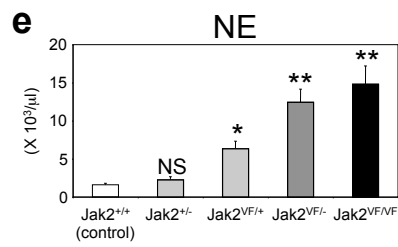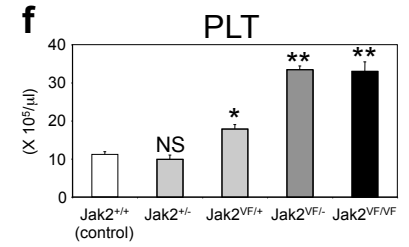

**Supplementary Figure S2**
